# Supplementary material for: Influenza A virus: sampling of the unique shorebird habitat at Delaware Bay, USA
Source: PubMed Central journal article supplement (PMC5717699; doi:10.1098/rsos.171420), 2017-11-15
Supplement: rsos171420supp1.pdf [file rsos171420supp1.pdf]

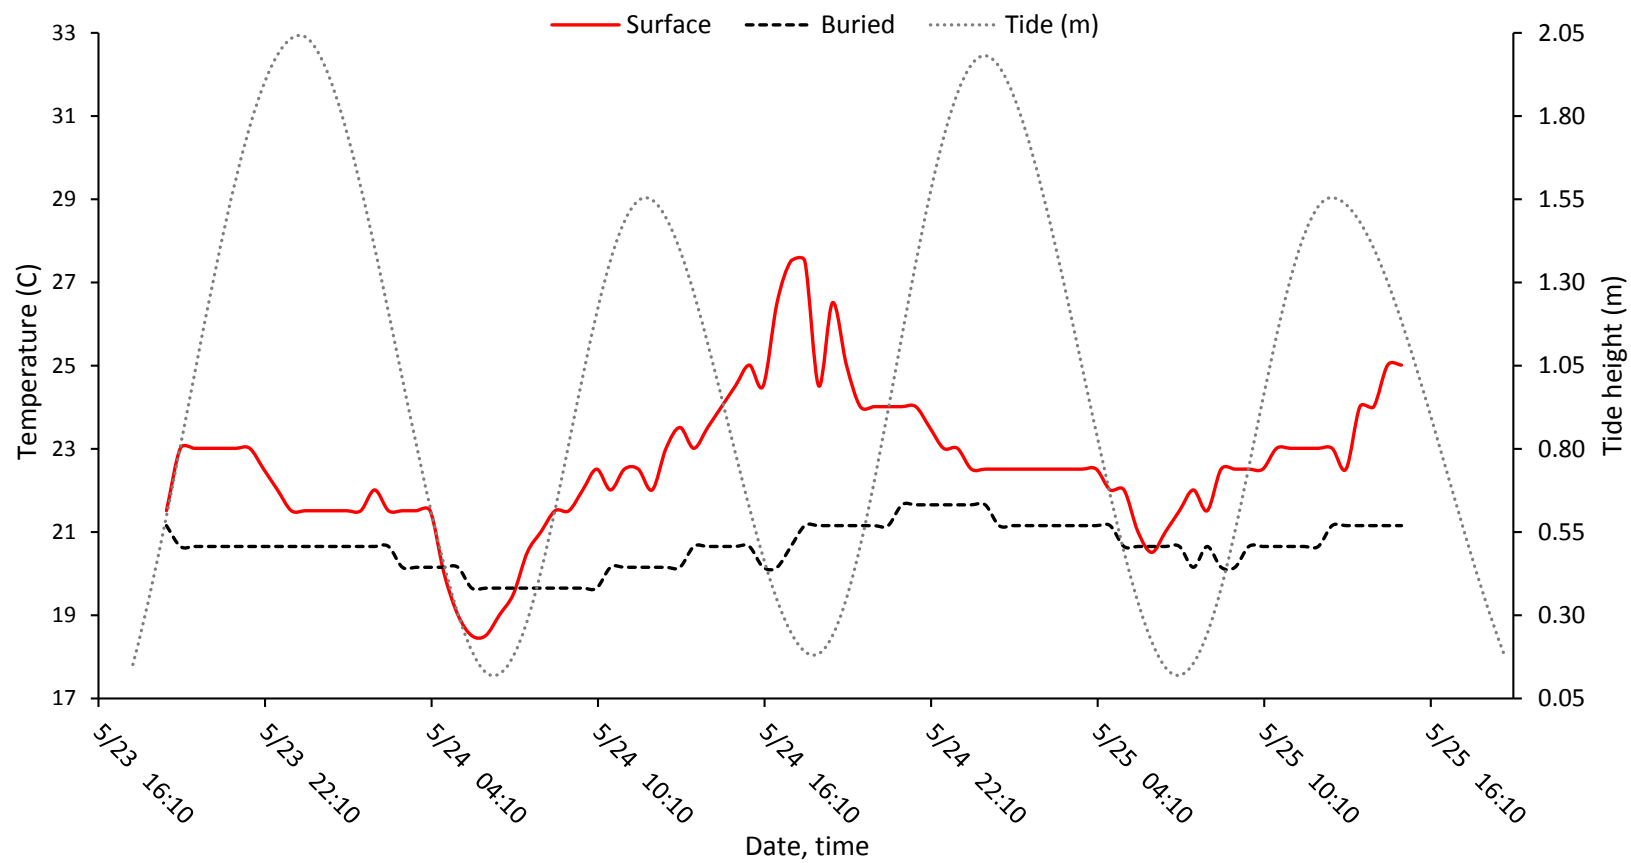

Supplemental Figure S1. Reeds Beach high tide temperature (C) profiles for surface (solid, red) and buried (dashed, black) temperature loggers over a 2-day time period in May 2012. Tide height in meters is reflected on the secondary axis (dotted, light grey).
